# Supplementary material for: Statins as Potential Preventative Treatment of ETX and Multiple Pore-Forming Toxin-Induced Diseases
Source: MDPI journal article supplement (doi:10.3390/ijms24065414), 2023-03-12
Supplement: s1 [file s1]

## Supplementary data

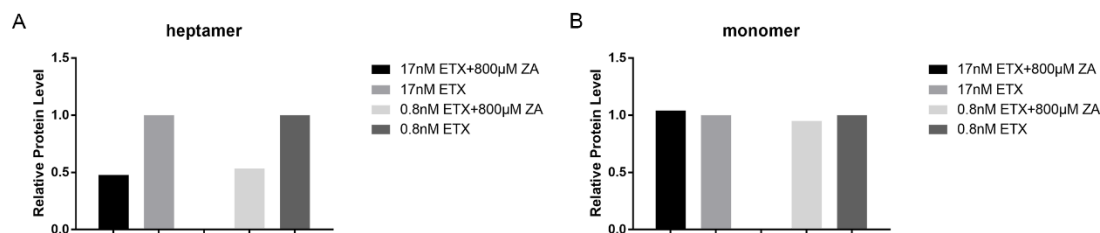

**Supplementary Figure S1. ZA reduces the formation of ETX heptamers in MDCK cells.** The amount of heptamer (A) and monomer (B) of Figure 3A were quantitated.

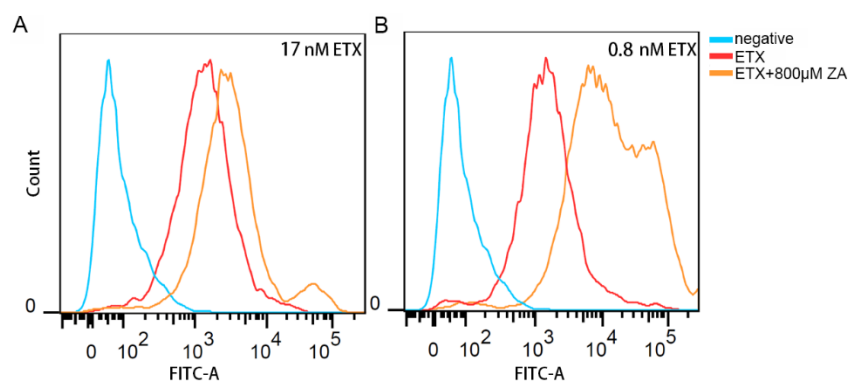

**Supplementary Figure S2. ZA strengthens the  $\text{Ca}^{2+}$  influx in ETX-treated MDCK cells.** This figure is the frequency curve of Figure 4B.

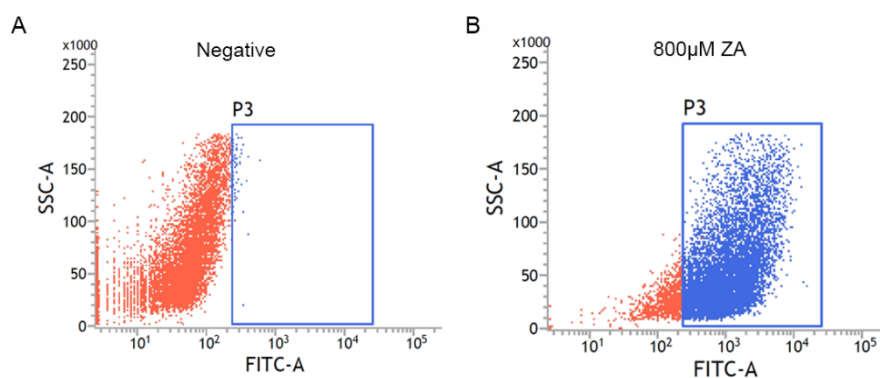

**Supplementary Figure S3. ZA alone induces  $\text{Ca}^{2+}$  influx in MDCK cells.** MDCK cells were preincubated in DMEM medium with (B) or without (A) 800  $\mu\text{M}$  ZA for 30 min and then digested with 0.25% trypsin to get single-cell suspensions. A suspension of MDCK cells ( $\sim 10^6$  cells/mL) were incubated for 25 min in fluo-4 AM (5  $\mu\text{M}$ ) at 37°C, washed once with a  $\text{Ca}^{2+}$ -containing saline, and incubation for 10 min. Then the cells were applied in a FACSaria flow cytometer via 488-nm excitation and 520-nm emission.

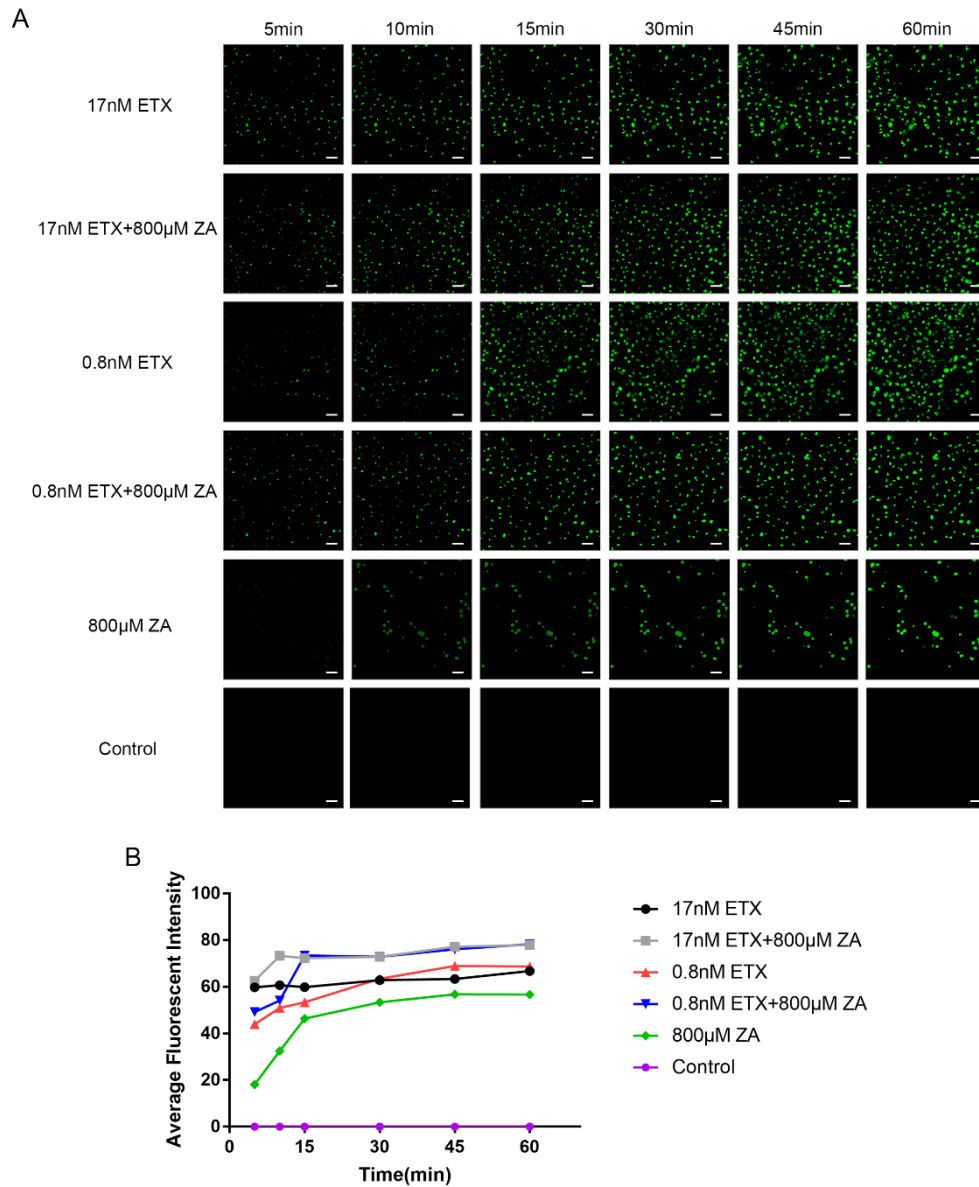

**Supplementary Figure S4. ZA induces  $\text{Ca}^{2+}$  influx in MDCK cells.** (A) MDCK cells were preincubated in DMEM medium with or without 800  $\mu\text{M}$  ZA for 30 min and then exposed to a  $\text{Ca}^{2+}$ -containing saline including ETX (17, 0.8 and 0 nM) and fluo-4 AM (5  $\mu\text{M}$ ) at 37°C. Then the cells were observed using a laser confocal scanning microscope (SP8; Leica, Wetzlar, Germany). (B) The average fluorescent intensity was measured using Image-Pro Plus.

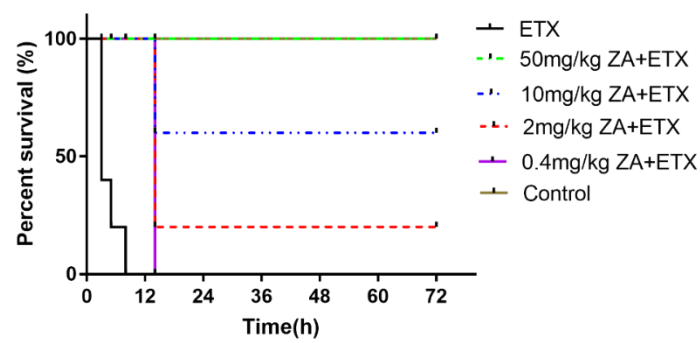

**Supplementary Figure S5. ZA can prevent the toxin-induced death of mice.** Mice were given an intraperitoneal injection of ZA (50, 10, 2 and 0.4 mg/kg/day) for 3 injections (-48, -24 and -0.5 h) and then challenged with ETX (6400 ng/kg) on time 0 and injected with PBS as control.

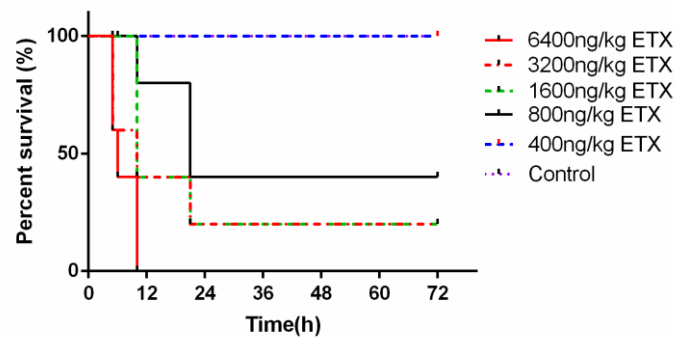

**Supplementary Figure S6. Determination of absolute lethal dose of ETX to mice.** Mice were challenged with 0.1 ml ETX (6400, 3200, 1600, 800 and 400 ng/kg) and injected with PBS as control. Then, observed for 72 h and statistical the survival rate.

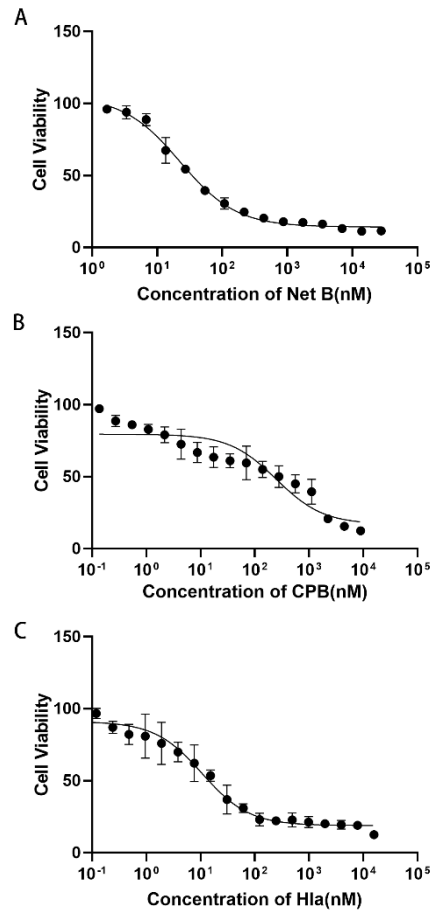

**Supplementary Figure S7. Cytotoxicity of pore-forming toxins toward MDCK cell line.** MDCK cells were incubated with ZA for 30 min, then exposed to Net B (A), CPB (B) or Hla (C) and observed for 72 h.
